# Supplementary material
Source: Springer Nature journal article supplement (https://www.springermedizin.de/resource/supplementary/12876_2013_1117_MOESM3_ESM.pdf/9438518)
Supplement: MOESM3 [file 9438518]

**Table 2: Relationship between demographic and clinical factors with the presence of faecal incontinence**

| Demographic and Clinical factors        | Survey sample, N | Proportion of patients with FI, n (%) | Proportion of patient without FI, n(%) | p value |
|-----------------------------------------|------------------|---------------------------------------|----------------------------------------|---------|
| All patients with FI                    | 1000             | 83(8.3)                               | 917(91.7)                              |         |
| Age groups, Median (IQR)                | 38(24)           | 47(28)                                | 37(24)                                 | <0.001  |
| 15 – 24 years                           | 59               | 3(5.1 %)                              | 56(94.9 %)                             |         |
| 25 – 44 years                           | 532              | 32(6.0 %)                             | 500(94.0 %)                            |         |
| 45 – 64 years                           | 318              | 31(9.7 %)                             | 287(90.3 %)                            |         |
| More than 65 years                      | 91               | 17(18.7 %)                            | 74(81.3 %)                             |         |
| Sex                                     |                  |                                       |                                        | 0.983   |
| Male                                    | 240              | 20(8.3%)                              | 220(91.7 %)                            |         |
| Female                                  | 760              | 63(8.3%)                              | 697(91.7 %)                            |         |
| Ethnicity                               |                  |                                       |                                        | 0.525   |
| Chinese                                 | 200              | 21(10.5 %)                            | 179(89.5 %)                            |         |
| Indian                                  | 595              | 44(7.4 %)                             | 551(92.6 %)                            |         |
| Malay                                   | 174              | 16(9.2 %)                             | 158(90.8 %)                            |         |
| Other                                   | 31               | 2(6.5 %)                              | 29(93.5 %)                             |         |
| Chronic disease                         |                  |                                       |                                        | 0.158   |
| Yes                                     | 238              | 25(10.5 %)                            | 213(89.5 %)                            |         |
| No                                      | 762              | 58(7.6 %)                             | 704(92.4 %)                            |         |
| Diabetes mellitus                       |                  |                                       |                                        | 0.026   |
| Yes                                     | 108              | 15(13.9 %)                            | 93(86.1 %)                             |         |
| No                                      | 892              | 68(7.6 %)                             | 824(92.4 %)                            |         |
| Hypertension                            |                  |                                       |                                        | 0.323   |
| Yes                                     | 177              | 18(10.2 %)                            | 159(89.8 %)                            |         |
| No                                      | 822              | 65(7.9 %)                             | 757(92.1 %)                            |         |
| Hypercholesterolemia                    |                  |                                       |                                        | 0.617   |
| Yes                                     | 74               | 5(6.8 %)                              | 69(93.2 %)                             |         |
| No                                      | 926              | 78(8.4 %)                             | 848(91.6 %)                            |         |
| Ischaemic heart disease                 |                  |                                       |                                        | 0.133   |
| Yes                                     | 24               | 4(16.7 %)                             | 20(83.3 %)                             |         |
| No                                      | 975              | 79(8.1 %)                             | 896(91.9 %)                            |         |
| Previous operation                      |                  |                                       |                                        | 0.068   |
| Pelvic, perineal or anorectal operation | 141              | 15(10.6 %)                            | 126(89.4 %)                            |         |
| Other operation                         | 144              | 7(4.9 %)                              | 137(95.1 %)                            |         |
| No previous operation                   | 715              | 61(8.5 %)                             | 654(91.5 %)                            |         |
| Defaecation frequency                   |                  |                                       |                                        | 0.571   |
| 1 – 7 times a week                      | 657              | 55(8.4 %)                             | 602(91.6 %)                            |         |
| 8 – 15 times a week                     | 244              | 19(7.8 %)                             | 225(92.2 %)                            |         |
| 16 – 21 times a week                    | 73               | 5(6.9 %)                              | 68(93.1 %)                             |         |
| More than 22 times a week               | 26               | 4(15.4 %)                             | 22(84.6 %)                             |         |

10 Jan 2013

|                      |     |            |             |       |
|----------------------|-----|------------|-------------|-------|
| Defaecation duration |     |            |             |       |
| 1 – 5 minutes        | 547 | 38(7.0 %)  | 509(93.0 %) | 0.001 |
| 6 – 10 minutes       | 291 | 18(6.2 %)  | 273(93.8 %) |       |
| 11 – 15 minutes      | 89  | 14(15.7 %) | 75(84.3 %)  |       |
| More than 15 minutes | 73  | 13(17.8 %) | 60(82.2 %)  |       |

Note: p value derived from  $\chi^2$  test
